# Supplementary material for: The landscape of BRAF transcript and protein variants in human cancer
Source: Springer Nature journal article supplement (doi:10.1186/s12943-017-0645-4), 2017-04-28
Supplement: MOESM2 [file 12255632]

**Supplementary Table S1. Coordinates of the exons of human *BRAF* analyzed in this study.**

| Exon         | GRCh38      |             | GRCh37      |             | length |
|--------------|-------------|-------------|-------------|-------------|--------|
|              | start       | end         | start       | end         |        |
| <b>E1</b>    | 140,924,764 | 140,924,566 | 140,624,564 | 140,624,366 | 199    |
| <b>E2</b>    | 140,850,212 | 140,850,111 | 140,550,012 | 140,549,911 | 102    |
| <b>E3</b>    | 140,834,872 | 140,834,609 | 140,534,672 | 140,534,409 | 264    |
| <b>E4</b>    | 140,808,995 | 140,808,892 | 140,508,795 | 140,508,692 | 104    |
| <b>E5</b>    | 140,808,062 | 140,807,960 | 140,507,862 | 140,507,760 | 103    |
| <b>E6</b>    | 140,801,560 | 140,801,412 | 140,501,360 | 140,501,212 | 149    |
| <b>E7</b>    | 140,800,481 | 140,800,362 | 140,500,281 | 140,500,162 | 120    |
| <b>E8</b>    | 140,794,467 | 140,794,308 | 140,494,267 | 140,494,108 | 160    |
| <b>E9</b>    | 140,787,584 | 140,787,548 | 140,487,384 | 140,487,348 | 37     |
| <b>E10</b>   | 140,783,157 | 140,783,021 | 140,482,957 | 140,482,821 | 137    |
| <b>E11</b>   | 140,781,693 | 140,781,576 | 140,481,493 | 140,481,376 | 118    |
| <b>E12</b>   | 140,778,075 | 140,777,991 | 140,477,875 | 140,477,791 | 85     |
| <b>E13</b>   | 140,777,088 | 140,776,912 | 140,476,888 | 140,476,712 | 177    |
| <b>E14</b>   | 140,754,233 | 140,754,187 | 140,454,033 | 140,453,987 | 47     |
| <b>E15</b>   | 140,753,393 | 140,753,275 | 140,453,193 | 140,453,075 | 119    |
| <b>E16</b>   | 140,749,418 | 140,749,287 | 140,449,218 | 140,449,087 | 132    |
| <b>E17</b>   | 140,739,946 | 140,739,812 | 140,439,746 | 140,439,612 | 135    |
| <b>E18.1</b> | 140,734,770 | 140,734,012 | 140,434,570 | 140,433,812 | 759    |
| <b>E18.2</b> | 140,734,770 | 140,734,617 | 140,434,570 | 140,434,417 | 154    |
| <b>E18.3</b> | 140,734,770 | 140,734,521 | 140,434,570 | 140,434,321 | 250    |
| <b>E18.4</b> | 140,734,770 | 140,734,479 | 140,434,570 | 140,434,279 | 292    |
| <b>E18.5</b> | 140,734,770 | 140,734,597 | 140,434,570 | 140,434,397 | 174    |
| <b>E19</b>   | 140,726,516 | 140,719,334 | 140,426,316 | 140,419,134 | 7183   |
| <b>NE1</b>   | 140,749,052 | 140,748,932 | 140,448,852 | 140,448,732 | 121    |
| <b>NE2</b>   | 140,747,447 | 140,747,366 | 140,447,247 | 140,447,166 | 82     |
| <b>NE3</b>   | 140,716,036 | 140,715,951 | 140,415,836 | 140,415,751 | 86     |
| <b>NE4</b>   | 140,749,052 | 140,748,995 | 140,448,852 | 140,448,795 | 58     |
| <b>NE5</b>   | 140,808,316 | 140,808,237 | 140,508,116 | 140,508,037 | 80     |
| <b>NE6</b>   | 140,834,872 | 140,834,061 | 140,534,672 | 140,533,861 | 812    |

**Supplementary Table S2. List of the human tumor samples used in this study.**

| Cancer                                | #<br>Sample | Sample Type |   |     |     |     |
|---------------------------------------|-------------|-------------|---|-----|-----|-----|
|                                       |             | 1           | 2 | 3   | 4   | 5   |
| Breast Cancer                         | 1250        | 1130        |   |     | 7   | 113 |
| Colon Cancer                          | 544         | 310         | 1 |     | 1   | 41  |
| Head and Neck Cancer                  | 551         | 505         |   |     | 2   | 44  |
| Lung Adenocarcinoma                   | 596         | 536         | 2 |     |     | 58  |
| Lung Squamous Cell Carcinoma (SCC)    | 555         | 504         |   |     |     | 51  |
| Melanoma                              | 472         | 103         |   |     | 365 | 1   |
| Thyroid Cancer                        | 620         | 529         |   |     | 10  | 81  |
| Acute Myeloid Leukemia (AML)          | 171         |             |   | 171 |     |     |
| Diffuse Large B-Cell Lymphoma (DLBCL) | 48          |             |   | 48  |     |     |
| <b>Total number of samples</b>        | <b>4807</b> |             |   |     |     |     |

1. primary solid tumor
2. recurrent solid tumor
3. primary blood-derived cancer
4. metastatic solid tumor
5. normal solid tissue

**Supplementary Table S3. Real-time PCR primers.**

| Name                                  | Sequence                     | Purpose                                                                            |
|---------------------------------------|------------------------------|------------------------------------------------------------------------------------|
| tot <i>BRAF</i> qRT-PCR F             | CAGCACCTACACCTCAGCAG         | real-time PCR amplification of all <i>BRAF</i> isoforms                            |
| tot <i>BRAF</i> qRT-PCR R             | GATACAAGCTGGAGCCCTCA         |                                                                                    |
| ref <i>BRAF</i> qRT-PCR F*            | CTGTCCACTGAAACAAATGAGTG      | real-time PCR amplification of <i>BRAF</i> -ref                                    |
| ref <i>BRAF</i> qRT-PCR R*            | CATATGTTTCATTTATTTTCCTTTTGTT |                                                                                    |
| <i>BRAF</i> -X1 qRT-PCR F             | AGTGCATCAGAACCCTCCTT         | real-time PCR amplification of <i>BRAF</i> -X1                                     |
| <i>BRAF</i> -X1 qRT-PCR R             | CTTGAAGGCTGCAAATTCTC         |                                                                                    |
| <i>BRAF</i> -X2 qRT-PCR F             | AGAGACCACTCTTTCCCAAGAGAA     | real-time PCR amplification of <i>BRAF</i> -X2                                     |
| <i>BRAF</i> -X2 qRT-PCR R             | TGTTAACAAATTGTACGAACAC       |                                                                                    |
| <i>BRAF</i> -E19-1 qRT-PCR F**        | ATGGAATTTCCCATCCAACA         | real-time PCR amplification of <i>BRAF</i> -X1 plus X2 (different sections of E19) |
| <i>BRAF</i> -E19-1 qRT-PCR R**        | TGAAGAAACACTGGCAGCAG         |                                                                                    |
| <i>BRAF</i> -E19-2 qRT-PCR F          | TCCTAGCTTCTGGTTTGTTG         |                                                                                    |
| <i>BRAF</i> -E19-2 qRT-PCR R          | GATCTGAGGAGGATGTGCAG         |                                                                                    |
| <i>BRAF</i> -E19-3 qRT-PCR F          | CTTGATTGCACATGAAGCTG         |                                                                                    |
| <i>BRAF</i> -E19-3 qRT-PCR R          | ATGGCCAGGTCATAAAGGAT         |                                                                                    |
| <i>BRAF</i> -E19-4 qRT-PCR F          | TTATGGCGACTCACACACAC         |                                                                                    |
| <i>BRAF</i> -E19-4 qRT-PCR R          | CTCCACGAGAACCCTTTTCAA        |                                                                                    |
| fl <i>BRAF</i> qRT-PCR F              | CCAGAGTGCTGTGCTGTTTA         | real-time PCR amplification of full length <i>BRAF</i>                             |
| fl <i>BRAF</i> qRT-PCR R              | CATTCTCCAACACTCCACA          |                                                                                    |
| <i>BRAF</i> -E2 qRT-PCR F             | GGGAGCATAATCCACCATCA         | real-time PCR amplification of exon 2-3 junction                                   |
| <i>BRAF</i> -E3 qRT-PCR R             | CGTTCCCAGAGATTCCAA           |                                                                                    |
| <i>BRAF</i> -E3 qRT-PCR F             | CCCAACAAACAGAGGACAGTG        | real-time PCR amplification of exon 3-4 junction                                   |
| <i>BRAF</i> -E4a qRT-PCR R            | GCACAGCACTCTGGATTAG          |                                                                                    |
| <i>BRAF</i> -NE6p qRT-PCR F           | TCACCATTTTGCTGTTTCTTTG       | real-time PCR amplification of NE6p exon                                           |
| <i>BRAF</i> -NE6p qRT-PCR R           | GGATGCCTCTATTTGCATGA         |                                                                                    |
| $\Delta$ [3-10] <i>BRAF</i> qRT-PCR F | CAATATATCTGGAGAAAACACTTGG    | real-time PCR amplification of $\Delta$ [3-10] <i>BRAF</i>                         |
| $\Delta$ [3-10] <i>BRAF</i> qRT-PCR R | TGAGGTGTAGGTGCTGTCAC         |                                                                                    |
| <i>GAPDH</i> qRT-PCR F                | CGCTCTCTGCTCCTCCTGTT         | house keeping genes for real-time PCR                                              |
| <i>GAPDH</i> qRT-PCR R                | CCATGGTGTCTGAGCGATGT         |                                                                                    |
| <i>PBGD</i> qRT-PCR F                 | TCCAAGCGGAGCCATGTCTG         |                                                                                    |
| <i>PBGD</i> qRT-PCR R                 | AGAATCTTGTCCTGTGGTGGGA       |                                                                                    |
| <i>SDHA</i> qRT-PCR F                 | CCACTCGCTATTGCACACC          |                                                                                    |
| <i>SDHA</i> qRT-PCR R                 | CACTCCCATTCTCCATCA           |                                                                                    |

\* real-time PCR primers used for the detection of the reference (canonical) 3'UTR of *BRAF* in Marranci et al., JID 2015

\*\* real-time PCR primers used for the detection of the X1 3'UTR of *BRAF* in Marranci et al., JID 2015

**Supplementary Table S4. PCR primers.**

| Name                         | Sequence                                          | Purpose                                                                         |
|------------------------------|---------------------------------------------------|---------------------------------------------------------------------------------|
| <i>BRAF</i> -E19-1 F         | ATGGAATTTCCCATCCAACA                              | PCR amplification of <i>BRAF</i> -X1 plus X2 (different sections of E19)        |
| <i>BRAF</i> -E19-1 R         | CTGGACCCAATGAGAAAGA                               |                                                                                 |
| <i>BRAF</i> -E19-2 F         | GGCTGTGTTCCCTTTACCAA                              |                                                                                 |
| <i>BRAF</i> -E19-2 R         | CAGTGACGCAGCCACATACT                              |                                                                                 |
| <i>BRAF</i> -E19-3 F         | CATGAAGCTGGACTGCGTTA                              |                                                                                 |
| <i>BRAF</i> -E19-3 R         | CTAATTGCCCATGCATTTT                               |                                                                                 |
| <i>BRAF</i> -E19-4 F         | TGACCGCTGGTTCTCATGTA                              |                                                                                 |
| <i>BRAF</i> -E19-4 R         | AGAAGGGGACAGCACAGAGA                              |                                                                                 |
| <i>BRAF</i> -E7 F            | AGGCGTCCTTAGCAGAGACT                              | PCR amplification of <i>BRAF</i> -X1 and X2 CDS                                 |
| <i>BRAF</i> -E8 F            | AAATCCATTCCAATTCCACA                              |                                                                                 |
| <i>BRAF</i> -E9-10 F         | ATTCGTGGTGATGGAGGAT                               |                                                                                 |
| <i>BRAF</i> -E19-1 qRT-PCR R | TGAAGAAACACTGGCAGCAG                              |                                                                                 |
| <i>BRAF</i> -E1/2 F*         | CGGAGGAGGTGTGGAATATC                              | PCR amplification of <i>BRAF</i> -004 transcript variant                        |
| <i>BRAF</i> -E4b R           | CCTCTCATCATCAGTGCTTTCTT                           | PCR amplification of the CDS of $\Delta$ [3-10] <i>BRAF</i> transcript variants |
| <i>BRAF</i> -E1/2 F*         | CGGAGGAGGTGTGGAATATC                              |                                                                                 |
| ref <i>BRAF</i> -STOP R      | TCAGTGGACAGGAAACGCACCATATC                        |                                                                                 |
| <i>BRAF</i> -X1-STOP R       | CTACTTGAAGGCTGCAAATTCTC                           |                                                                                 |
| Mut X2 Lys>Arg F             | GTTTCGTACAATTTGTTAACATCAGAACACAGTTCTGTTCCCTCAAATC | mutagenesis of Lysine 739 residue to Arg within <i>BRAF</i> -X2 C-term          |
| Mut X2 Lys>Arg R             | GATTTGAGGAACAGAACTGTGTTCTGATGTTAACAAATTGTACGAAC   |                                                                                 |

**Supplementary Table S5. siRNA sequences.**

| <b>Name</b>                     | <b>Sequence</b>         | <b>Purpose</b>                            |
|---------------------------------|-------------------------|-------------------------------------------|
| si-tot <i>BRAF</i>              | AGAAUUGGAUCUGGAUCAUUU   | knock-down of all <i>BRAF</i> isoforms    |
| si-ref <i>BRAF</i>              | UCCUGUCCACUGAAACAAA     | knock-down of <i>BRAF</i> -ref            |
| si- <i>BRAF</i> -E19-1          | UGCUGCCAGUGUUUCUUCA     | knock-down of <i>BRAF</i> -X1 plus X2     |
| si- <i>BRAF</i> -E19-2          | AGGGCAGUGUCUUAACAAA     | knock-down of <i>BRAF</i> -X1 plus X2     |
| si- <i>BRAF</i> -E19-3          | AUGAUGGGCAGCAAUCAUGUAUU | knock-down of <i>BRAF</i> -X1 plus X2     |
| si-fl <i>BRAF</i>               | CUGUCAACAUGUGGUUUAU     | knock-down of fl <i>BRAF</i>              |
| si- $\Delta$ [3-10] <i>BRAF</i> | UGGAGAAAACACUUGGUAG     | knock-down of $\Delta$ [3-10] <i>BRAF</i> |
| si-CT                           | CUCCGAACGUGUCACGUU      | control siRNA                             |
