# Supplementary material for: The landscape of BRAF transcript and protein variants in human cancer
Source: Springer Nature journal article supplement (doi:10.1186/s12943-017-0645-4), 2017-04-28
Supplement: MOESM3 [file 12255632]

**Supplementary Notes**

**Primers and siRNAs location along *BRAF*-ref, *BRAF*-X1 and *BRAF*-X2 mRNAs.**

***BRAF*-ref sequence starting from ATG**

**ATG**CGGGCGCTGAGCGGTGGCGGTGGTGGCGGCGGGAGCCGGGCCAGGCTCTGTTCAACGGGGACATGGAG  
CCCCGAGGCCGGCGCCGGCGCCGGCGCCGCTCTTCGGCTGCGGACCCTGCCATTCGGAGGAGGTGTGG  
AATATCAAACAAATGATTAAGTTGACACAGGAACATATAGAGGCCCTATTGGACAAATTTGGTGGGGAGCAT  
AATCCACCATCAATATATCTGGAGGCCTATGAAGAATACACCAGCAAGCTAGATGCACTCCAACAAAGAGAA  
CAACAGTTATTGGAATCTCTGGGGAACGGAAGTGAATTTTTCTGTTTCTAGCTCTGCATCAATGGATACCGTT  
ACATCTTCTTCTCTCTAGCCTTTTCAGTGCTACCTTCATCTCTTTTCAGTTTTTTCAAATCCCACAGATGTG  
GCACGGAGCAACCCCAAGTCAACACAAAACCTATCGTTAGAGTCTTCTGCCCAACAAACAGAGGACAGTG  
GTACCTGCAAGGTGTGGAGTTACAGTCCGAGACAGTCTAAAGAAAGCACTGATGATGAGAGGTCTAATC**CCA**  
**GAGTGCTGTGCTGTTT**CAGAATTCAGGATGGAGAGAAGAAACCAATTGGTTGGGACACTGATATTTCTCGG  
CTTACTGGAGAAGAATTGCA**TGTGGAAGTGTGGAGAATG**TTCCACTTACAACACACAACCTTTGTACGAAAA  
ACGTTTTTTCACCTTAGCATTGTTGTGACTTTTTGTGCGAAAGCTGCTTTTTCCAGGGTTTTCCG**CTGTCAAACATGT**  
**GGTTATAAATTT**CACCAGCGTTGTAGTACAGAAGTTCCACTGATGTGTGTTAATTATGACCAACTTGATTTG  
CTGTTTGTCTCCAAGTTCTTTGAACACCACCCAATACCACAGGAAG**AGGCGTCTTAGCAGAGACT**GCCTTA  
ACATCTGGATCATCCCCTTCGCACCCGCCTCGGACTCTATTGGGCCCAAATTCTCACCAGTCCGTCTCCT  
TCA**AAATCCATCCAAATCCACAG**CCCTTCGACACAGATGAAGATCATCGAAATCAATTTGGGCAACGA  
GACCATCCTCATCAGTCCCAATGTGCATATAAACACAATAGAACCTGTCAATATTGATGACTTGATTAGA  
GACCAAGG**ATTTCTGTTGGTATGGAGGAT**CAACCACAGTTTTGTCTGCTACCCCCCTGCCTCATTACCTGGC  
TCACTAACTAACGTGAAAGCCTTACAGAAATCTCCAGGACCTCAGCGAGAAAGGAAGTCATCTTCATCCTCA  
GAAGACAGGAATCGAATGAAAACACTTGGTAGACGGGACTCGAGTGATGATTGGGAGATTCTGATGGGCAG  
ATTACAGTGGGACAA**AGAATTGGATCTGGATCATTT**GGAACAGTCTACAAGGGAAAGTGGCATGGTGTGTG  
GCAGTGAATGTTGAATGTGA**CAGCACCTACACCTCAGCAG**TTACAAGCCTTCAAAAATGAAGTAGGAGTA  
CTCAGGAAAACACGACATGTGAATATCCTACTCTTCATGGGCTATTCCACAAAGCCACAACCTGGCTATTGTT  
ACCCAGTGGT**GTGAGGGCTCCAGCTTGTATC**ACCATCTCCATATCATTGAGACCAAATTTGAGATGATCAAA  
CTTATAGATATTGCACGACAGACTGCACAGGGCATGGATTACTTACACGCCAAGTCAATCATCCACAGAGAC  
CTCAAGAGTAATAATATATTTCTTCATGAAGACCTCACAGTAAAAATAGGTGATTTTGGTCTAGCTACAGTG  
AAATCTCGATGGAGTGGGTCCCATCAGTTTGAACAGTTGTCTGGATCCATTTTGTGGATGGCACCAGAAGTC  
ATCAGAATGCAAGATAAAAAATCCATACAGCTTTCAGTCAGATGATATGCATTTGGAATTGTTCTGTATGAA  
TTGATGACTGGCAGTTACCTTATTCAAACATCAACAACAGGGACCAGATAATTTTTATGGTGGGACGAGGA  
TACCTGTCTCCAGATCTCAGTAAGGTACGGAGTAACCTGTCCAAAAGCCATGAAGAGATTAATGGCAGAGTGC  
CTCAAAAAGAAAAGAGATGAGAGACCACTCTTTCCCAA  
ATTCTCGCCTCTATTGAGCTGCTGGCCCGCTCATTGCCAAAAATTCACCGCAGTGCATCAGAACCCTCCTTG  
AATCGGGCTGGTTTCAAACAGAGGATTTTAGTCTATATGCTTGTGCTTCTCCAAAAACACCCATCCAGGCA  
GGGGGATATGGTGCCTT**TCCTGTCCACTGA**AAACAAATGAGTGAGAGAGTTCCAGGAGAGTAGCA**ACAAAAGGA**  
**AAATAAATGAACATATG**TTT...

**START codon**

Exon 1-17

Exon 18.3

**STOP codon**

si-tot*BRAF*

si-fl*BRAF*

si-ref*BRAF*

**primers tot*BRAF* qRT-PCR F/R: 153bp**

**primers ref*BRAF* qRT-PCR F/R: 70bp**

**primers fl*BRAF* qRT-PCR F/R: 115bp**

**BRAF-X1 sequence starting from ATG**

ATGGCGGCGCTGAGCGGTGGCGGTGGTGGCGGCGGGAGCCGGGCCAGGCTCTGTTCAACGGGGACATGGAG  
CCCAGGCCGGCGCCGGCGCCGGCGCCGCGGCTCTTCGGCTGCGGACCCTGCCATTCCGGAGGAGGTGTGG  
AATATCAAACAAATGATTAAGTTGACACAGGAACATATAGAGGCCCTATTGGACAAATTTGGTGGGGAGCAT  
AATCCACCATCAATATATCTGGAGGCCTATGAAGAATACACCAGCAAGCTAGATGCACTCCAACAAAGAGAA  
CAACAGTTATTGGAATCTCTGGGGAACGGAACCTGATTTTTCTGTTTCTAGCTCTGCATCAATGGATACCGTT  
ACATCTTCTTCTCTTCTAGCCTTTTCAGTGCTACCTTTCATCTCTTTTCAGTTTTTCAAATCCCACAGATGTG  
GCACGGAGCAACCCCAAGTCACCACAAAACCTATCGTTAGAGTCTTCTGCCCAACAAACAGAGGACAGTG  
GTACCTGCAAGGTGTGGAGTTACAGTCCGAGACAGTCTAAAGAAAGCACTGATGATGAGAGGTCTAATCCAG  
GAGTGCTGTGCTGTTTACAGAATTCAGGATGGAGAGAAGAAACCAATTGGTTGGGACACTGATATTTCTTGG  
CTTACTGGAGAAGAATTGCAATGTGGAAAGTGTGGAGAAATCTTCCACTTACAACACACAACCTTTGTACGAAAA  
ACGTTTTTTCACCTTAGCATTTTGTGACTTTTTGTGAAAGCTGCTTTTTCCAGGGTTTCCGCTGTCAAACATGT  
GGTTATAAATTTACCAGCGTTGTAGTACAGAAGTTCCACTGATGTGTGTTAATTATGACCAACTTGATTTG  
CTGTTTGTCTCCAAGTTCTTTGAACACCACCAATACCACAGGAAGAGGGCTCCTTAGCAGAGACTGCCCTA  
ACATCTGGATCATCCCTTCCGCACCCGCCTCGACTCTATTGGGCCCAAATTTCCACCAGTCCGTCTCCT  
TCAAATCCATTCCAATCCACAGCCCTTCCGACCAGCAGATGAAGATCATCGAAATCAATTTGGGCAACGA  
GACCGATCCTCATCAGCTCCCAATGTGCATATAAACACAATAGAACCTGTCAATATTGATGACTTGATTAGA  
GACCAAGGATTTTCGTGGTGATGGAGGATCAACCACAGGTTTTGTCTGCTACCCCCCTGCCTCATTACCTGGC  
TACTAATAACGTGAAAGCCTTACAGAAATCTCCAGGACCTCAGCGAGAAAGGAAGTCACTTTCATCCTCA  
GAAGACAGGAATCGAATGAAAACACTTGGTAGACGGGACTCGAGTGATGATTGGGAGATCTCTGATGGGCAG  
ATTACAGTGGGACAAAGAATTGGATCTGGATCATTGGAAACAGTCTACAAGGGAAAGTGGCATGGTGTATGTG  
GCAGTGAATAATGTTGAATGTGACAGCACCTACACCTCAGCAGTTACAAGCCTTCAAATAAGTAGGAGTA  
CTCAGGAAAACACGACATGTGAATATCCTACTCTTCATGGGCTATTCCACAAAGCCACAACCTGGCTATTGTT  
ACCCAGTGGTGTGAGGGCTCCAGCTTGTATCACCATCTCCATATCATTGAGACCAAATTTGAGATGATCAAA  
CTTATAGATATTGCACGACAGACTGCACAGGGCATGGATTACTTACACGCCAAGTCAATCATCCACAGAGAC  
CTCAAGAGTAATAATATATTTCTTCATGAAGACCTCACAGTAAAAATAGGTGATTTTGGTCTAGCTACAGTG  
AAATCTCGATGGAGTGGTCCCATCAGTTTGAACAGTTGTCTGGATCCATTTTGTGGATGGCACCAGAAGTC  
ATCAGAATGCAAGATAAAAAATCCATACAGCTTTTCAGTCAGATGTATATGCATTTGGAATTGTTCTGTATGAA  
TTGATGACTGGACAGTTACCTTATTCAAACATCAACAACAGGGACCAGATAATTTTTATGGTGGGACGAGGA  
TACCTGTCTCCAGATCTCAGTAAGGTACGGAGTAAGTGTCCAAAAGCCATGAAGAGATTAATGGCAGAGTGC  
CTCAAAAAGAAAAGAGATGAGAGACCACTCTTTCCCAA  
ATTCTCGCCTCTATTGAGCTGCTGGCCCGCTCATTGCCAAAAATTCACCGCAGTGCATCAGAACCCTCCTTG  
AATCGGGCTGGTTTCCAAACAGAGGATTTTAGTCTATATGCTTGTGCTTCTCAAAAACACCCATCCAGGCA  
GGGGATATG  
GAGAATTTGACGCTTCAAGTCCACCATCATGGCAGCATCTGCTCTTATTTCTTAAAGTCTTGTGTTTCGTA  
CAATTTGTTAACATCAAAAACACAGTTCTGTTCCCTCAAATCTTTTTTTAAAGATACAAAATTTCCAATGCATA  
AGCTGATGTGGAACAGAAATGGAATTTCCCATCCAACAAGAGAGAAAGAATGTTTTAGGAACCAGAATTCTC  
TGCTGCCAGTGTCTTCAACAAAATACCACGAGCATAACAAGTCTGCCAGTCCCAGGAAGAAAGAGGAGA  
GACCCTGAATTTCTGACCTTTTGTATGGTCAGGCATGATGGAAAGAAACTGCTGCTACAGCTTGGGAGATTTGC  
TATGGAAAGTCTGCCAGTCAACTTTGCCCTTCTAACACCAGATCAATTTGTGGCTGATCATCTGATGGGGC  
AGTTTTCAATCACAAGCATCGTTCTTTCTGTTCTGGAATTTTGTGGAGCTCTTTCCCTAGTGACC  
ACCAGTTAGTTTCTGAGGGATGGAACAAAATGCAGCTTGCCTTTCTATGTGGTGCCTGTTTCAGGCCTTGA  
CAGATTTTATCAAAAAGGAAACTATTTTATTTAAATGGAGGCTGAGTGGTGGAGTAGATGTGTCTTGGTATGGA  
GGAAAAGGGCATGCTGCATCTTCTTCCCTGACCTCCGGGCTCTGCGCTTTTGTCTTCTGCTCACTGAGGG  
GTCTGTCTAACAAGCAGGCTAGATAGTGTGTCACACACTTGCCTTCTTTCTCATTGGGTCAGCAATGAAG  
ATAAGTGTGGGTTTTTTTTTTTTTCTTCCACAATGTAGCAAATTTCTCAGGAAATACAGTTTATATCTTCT  
CCTATGCTCTTCCAGTCACCAACTACTTATGCGCTACTTTGTCCAGGGCACAAAATGCCGTGGCAGTATCT  
AACTAAACCCCCACAAAACCTGCTTAATAACAGTTTTGAATGTGAGAAATTTAGATAATTTAAATATAAGGTA  
CAGGTTTTAATTTCTGAGTTTCTTCTTTCTATTTTTATTAAGAAAGAAAATAATTTTCAGATTTAATTGAAT  
TGGAACAAAACAATACTTCCCACCAGAATTATATATCCTGAAAATTTGATTTTTTGTATATAAACAACCTTTT  
AAGAAAGATCATTATCTTTTCTTACCTAAATATGAGGAGTCTTAGCATAATGACAAATATTTATAATTTT  
TCAATTAATGGTACTTGGTGGATCCACACTAACATCTTTGCTAATAATCTCATTGTTTCTTCCAACCTGATTC  
CTAACACTATATCCACATCTTCTTTCTAGTCTTTTATCTAGAATATGCAACCTAAAATAAAAATGGTGGCG  
TCTCCATTCACTTCTTCTTCTTTTCTTTTCCCAAGCCTGGTCTTCAAAGGTTGGGCAATTTGGCAGCTGAA  
TTCCCAGACAGAGAATAGAGCAATTTTAGGGATATTAGGACTGAGGGAGGGTGTGGGAAAGCTGTCATCAGT  
TGTTTTTATAGAAAGAACTGGCATTCAATTAAGAACCTAAATCTTATCTTTGCACAAATGGAAAATATAACCT  
AGTTATAGCTTCTTTGGCCTTTATTAAGGGTAATATCAATCACAGTCATAGCAAAGAAAGCGGATGTATT  
AATGGCAAATTAATGGAAAACCTCCCTTATCAGGAATCTAGACTCAGAATTTAGGAACACAAATCAATCAG

ACCAACCAAGCTATAGCCAAGGACTTGAAAGAAATTAACAAGACCCAGAATAAATCAAGGAATTAGAAATT  
GTTATTTAAAAATTTTCAGATTGTAACCTCCAGGCCCTGCTGTCTATATTGCAGCCACTAAAAGCTCACTACCA  
TTAGATTTTTGCTAACATACATGTATTTCAGAAGAAAGCCTATTGAAATTTTCATTGTCTTGTAAAAGTTGT  
CCTAGTAAAATGGAAAAGATCCTTAAGTTATTAATCAGTTTTGAAAAGCAAATTTGTTTTTAAGTTTTACATC  
AGCAGGGCAGTGTCTTACAAAAATTCAGAAATTGCAAAGGTGGAAATAATTCACGCTGATTTGAAGAACATCT  
TCTGTGCAATAACTGCCTCTCTTGAAGCATTGGCTGTTTTTTCTTTTTAAATATATCTCTAGATGCTT  
TTAAATGTGGCTGTGTTCCCTTTACCAAAGATTGGCTTCAAGTTTCCGCAGGTAGAGAGACCTGGGCTTGAAC  
AAGAGGATGTGTTTCATGTCTGCTGAGGAGGTAGAACATGTGCAGCCTGGGTCCGGGACTGCCTCCGTGGG  
GCAGGGGCAGGGGCGGTACCATTAGGGAGGAAGCTTAGCATTTTCAGTTTCTTAAACAATATTTCAGGGTGATA  
CACTTTTTCTTCCCTTGCATTTTGAATAGGCTGGTATCTCATTGAAACGGGGGAGCAGACTTGATCTCAAA  
TGAAGCTGTGCCAGGAGCCAGGCTTAGCATATTGAGATTTTTATAGATACCTTAAAAAATAAAATATTTAA  
ACCTCTCTTTTTCTTCTTTTTCTATGAAATAGGTTTTTTCTCTAGTTTACAAATGACATGAAAATAGGTTTT  
ATTTGTGTTTTATCTGCTTTATTTTTTGATGCTTAGACAACAGTTAGACTTACTGAGCTCCTAAAAAACGA  
GGAAGAAGTCTTATTTGTGAAAAGCACTTTATGAGTAATTGTATAGACAGTATGTGGCTGCCTACTG  
ATCTTGTAAAGGTGTAACAGTCTTGTCTGTAAAGTGGCTGCAGTGCCTTCTGTAGTGTGTTTTATTTTTGGT  
AGGGAGAGGTGAAGCCTTCTGAAAAATTTGAGAGCAACTACAGAGGATTGTTTGTAACTGTGTAGTATTCT  
GATGGACTTTTTTCATCGTTAGAGTCAAGGACCTAGACTTTTTGCCACTGAAATAATATTGACCAAAAAATA  
GTTTATAAAAGGGATTTGTGAATAGAAAATTCAGTGTGATCATTGTTGTTAATGTGCACCTTAAAAGAAGA  
TTCTGTCTAGCTGTCAAATCTGGTTCGGGAATATCTCACCCCTGATTGTATTTGAGATCTAGTAGGGCATA  
CTGGGGCATTTTAGAAGATAAAATCCCATACAAATGATATATCTATATTTATGTTGGTATTTGGAGAAAA  
GAGCAGTATATAAAGAAATAATCAAGACTGCAGCACTGTCAACCTGAAACTTTGTAAATTTTCCTAGTTT  
CTGGTTTTGGTGCGGGTGACAGCACTTTTCATCACAGGATGTTACCTTGTATTACCAGGCGGAGTGCAGCTGC  
TGCACATCCTCCTCAGATCTCACCTGTCCCCACTGTACATCCACCCGCCAGCTGCTTGCAAACCTCATCTCT  
AGCTTTAGTTCGAAACCACATTGCAGGGTTTCAGGTGACCTCTACAAAAACTACCTCTTCAGAATGAGGTAA  
TGAATAGTTATTTATTTTAAAAATATGAAAAGTCAGGAGCTCTAGAACATGACGATGATTTAAGATTTTAACT  
TTTTTGTGTACTTGTATTTGAGCACTCTCATTGTTGCTTAAAGGGCATTATACATTTAAGCAGTAATACTGT  
AAAAAATGTGTTGCTCGGAATATCTGAATGTTGTTGAAAGTGGTGCCAGAACCGTTTTAGGGGTACGTTTC  
AGAATCTTAACCTTGAGTCAATTGCATGAAATTAATAGCTGTGGTATCACTTCACTAACAGTGTGTAATT  
TTAATTTTCAGTAGGCTTGGCATGACAGTACATCCTCATAATGAGTTTGTGCAGCTTTGTGCATGCACAG  
GCATTCATAGAAAGACCACCCAGCTAAGAGGGTAGAATGATTACTTTTTTGCAGATTCTCTTCTTTGTCC  
AAGTTGGCATTGTTAGTGCTAGGAATACCAGCACCTTGAGACGAGCAGATTCCAACCATTAGGCTATAAACA  
CCATAGCCAGAGATGGAAGGTTTACTGTGAGTATGAACAGCAAATAGCTTACAGGTCTAGATTGAAATGGT  
GTAGGTAGGCTCTAGAAAAATACCTTGCAATTTGCCAAATGATCTTACTGTGCCTTCATGATGCAATAAA  
AAAGCTAACATTTTTAGCAGAAATCAGTGAATTTGTAAGAGAGCAGCCACTCTGGTTTAACTCAGCTGTGTTA  
ATAATTTTTTAGAGTGCAATTTAGACTGCATAGGTAAATGCCTAAAGAGTTTATAGCCAAAATCACATTTAA  
CAATGAGAAAACACACAGGTAAATTTTTCAGTGAACAAAATATTTTTTTTTAAAGCACATAATCCCTAGTATAG  
TCAGATATATTTATCACATAGAGCAACTAGGTTGCAAATATAGTTCAGTGCATTTCTAGAGAAACTTTTTTC  
TACTCCCATAGGCTCTTCAAAGCATGGAACTTTTATACAACAGAAATGTTGACAGAAATGCTGTAGTTTGTAG  
GGTTGAAGTACTGTATGATGGGCAGCAATCATGTATTAACTTAGAAGGGGAAATTTGAAATATAGGACCGAAT  
TTGGTTTTTATCAGTTTCCAGAGTACTGCTGCCAACCTAGACACTGATTTTTTTCAGAGTTTGAATGTAAATTT  
CTTCCCGGGACTTGATTGCACATGAAGCTGGACTGCGTTAGTGCATCCTGTCCCAAAGCGCTGTGGGGCCAG  
GGTGGAGGTCTCAAGGCATCCTTTATGACCTGGCCATTTGGATGTAAAAGAAAACATATTTCCATGCTGTGGTT  
CTTGTATCTTGTTCATTTCCTCACCATTGAAAGAGAAAGTCCATGTATTGTCTCCAGCACATCCTTGAATG  
TTATACTGGGATGGATTACTGATGCCATCGGTAGTTGAGCCCCAGAAGAGGGTAGTAGCATCTCTGCCTCA  
GGTATGATTTGTAGCTTGGCCAGAGGAGAGCGGAGTACCAGTATATCTGTGGTCCATGTTGTCTAGCTCTG  
GTAAAATTTAAAAATACTGGTAAGATGTTTGTTTTTATTAGTACACTAGACAGTAAGCTCTGTTTTGTTGTTTT  
CAAATAACCTATTTTCACTTTTGTGGGCAAAGACATTTAAATTTGAAATTTCAATTTTAAATTTTGTAAAT  
GTGGAAAGGGTAATTAACAGTTTCTATCAGGTATTTTTAATGTGGAAAAGGACAGAAACCCAACTCCTAAAA  
TCTTAAATTAAGGTAACAGTGCTTTAAAAAAAAAAAATGCATGGGGCAATTAGTGGCAACTCAATGAGTGA  
CTAAAGTACTTTTTATTTAACATCCACAACCTTCAACTGTAAAGTTTTATTAATTAATAACTAAATCAGCTTTATTA  
AATGTTGACATTTATTTAGCTATTTTGAATAATTATAGTGACTTGACGAGTGTGTATGAGGACACAGCCAAT  
GTAAGCCAGTGTATCCATTTTTTGTAGAGGTGCATTTTTTTTTTAAAGAATTTCTGTAGATAGAAGTGTCTGAAA  
ACAATAAATATGTTTATTCATGGTAGTATCAAAAAATGTTTGTACAAACCATCTGCTTCTCCCGGCCAGC  
CGAGTTCATTCTCCAGCACCGTGACCGCTGGTTCTCATGTACAGCACATATGCGGGGAGAGTTGGCAGAAAAT  
TTGTGAAGAGATGCCGCAAAGGAAGGGTCTGTTGACGGGTGGGATTGGGGGTTTTGATGAAGTTGCTTAGTC  
CTGGTTTTGTTTTGAAAATTAAGCTGCTTGCATTTTTGTGTTAAGTTTTTGAACCCACGTGTGTTTTGGTGG  
GTATGAGTTGGAAGTCACTGCAAACCTAGCATAAACAACAAAGCTCACAGAGTAGGCACAGATGTAGAGAACA  
GAGACAAAATGGGGTGAAGTGGCAGTAAATCTAGGATAGGGAAAAATTAATGTGAGGGTGGGAAATAAAT

GTAATTACCTGAAATCAAATGTAAGAGTGCAATAAGTATGCTTTTTATTCTAAGCTGTGAACGGTTTTTTTTA  
AGAATCATTCCCTTCTAATACATTTGTGTATGTTCCATAGCTGATTAAAACCAGCTATATCAACATATAATG  
CCTTTTTATTTCATGTTAATGACCAACGTAAGTGGCTAGCCTTTATGTCTTATTTATCTTCATGTTATGTTAG  
TTTACATACAGGGGTGTATG**TCTCTGTGCTGTCCCCTTCT**CCTGCCTTCATTTTAAAATGCATCCATGGGTC  
CTCCGTGTTTTCTTTGGCCATGCCACATATATAGACTCAGTTTGGCCTTCATGATATCGCCTGATTTTTGAG  
GACTGTATCACAGTGATATGTATTTGTGGTAATCTCATTTGTTGGTTGTACATCTGATCCTTTCTCAACAT  
GGCAATTGCTGCCTTTCCCTAAGATAGGATCATACAACTGATCAGGGGATTGAATTTGATCATTCAACAT  
GTGTCTCTGAATTTTATTCAGTAGTTGTCATTGCTCTTTGGTTTAGACCAAGAAAAGGAAATCCCCCTTT  
TCATGTATTCCTTGGTTTGGAGACATGACTCCTGTAAGGGAGAGGAAAGGGAGATGCTTCCTGTTTGAAGT  
CAGTGAATTCACGGTTCCTGTTTACCCTCCAAACCT**TTATGGCGACTCACACACAC**ATTCTCTTTTCTGT  
TACTGCCAAAGTTTCGGGTTTAGTACACTTCAGTTCCACTCAAGCA**TTGAAAAGGTTCTCGTGGAG**TCTGGG  
GCGTGCCAGTAAAAGATGGGGACTTTTTAATTGTCCACAGACCTCTCTATACCTGCTTTGCAAAAATTAC  
AATGGAGTAACTATTTTTAAAGCTTATTTTTCAATTCATAAAAAAGACATTTATTTTCAGTCAAATGGATGA  
TGTCTCCCTCTTTCCCTATTCTCAATGTTTGCTTGAATCTTTTATTATTTTTTTAATTCTCCCCCATA  
CCACTTCCTGATACTTTGGTTCTCTTTCTGCTCAGGTCCCTTCATTTGTACTTTGGAGTTTTTCTCATGTA  
AATTTGTATAACAGAAAATATTGTTTCAAGTTGGATAGAAAGCATGGAGAATAAAAAAGATAGCTGAAATTC  
AGATTGAAGAAATTTATTTCTGTGTAAAGTTATTTAAAACCTGTATTATATAAAAGGCCAAAAAAGTTCTAT  
GTACTTGATGTGAATATGCGAATACTGCTATAATAAAGATTGACTGCATGGAGAA

**START codon**

Exon 1-17

Exon 18.2

Exon 19

**STOP codon**

si-tot*BRAF*

si-fl*BRAF*

si-*BRAF*-E19-1/2/3

**primers tot*BRAF* qRT-PCR F/R: 153bp**

**primers *BRAF*-X1 qRT-PCR F/R: 123bp**

**primers *BRAF*-E19-1/2/3/4 qRT-PCR, 4 F/R pairs: 74, 100, 99, 101bp**

**primers fl*BRAF* qRT-PCR F/R: 115bp**

**primers *BRAF*-E7, E8, E9-10**

used with *BRAF*-E19-1 qRT-PCR R:

**1606, 1505, 1356bp**

**primers *BRAF*-E19-1/2/3/4: 4 F/R pairs, 623, 565, 609, 595bp**

*BRAF*-E19-1 F coincides with *BRAF*-E19-1 qRT-PCR F

**BRAF-X2 sequence starting from ATG**

ATGGCGGCGCTGAGCGGTGGCGGTGGTGGCGGCGCGGAGCCGGGCCAGGCTCTGTTCAACGGGGACATGGAG  
CCCAGGCCGGCGCCGGCGCCGGCGCCGCGGCTCTTCGGCTGCGGACCCTGCCATTCCGGAGGAGGTGTGG  
AATATCAAACAAATGATTAAGTTGACACAGGAACATATAGAGGCCCTATTGGACAAATTTGGTGGGGAGCAT  
AATCCACCATCAATATATCTGGAGGCCTATGAAGAATACACCAGCAAGCTAGATGCACTCCAACAAAGAGAA  
CAACAGTTATTGGAATCTCTGGGGAACGGAACCTGATTTTTCTGTTTCTAGCTCTGCATCAATGGATACCGTT  
ACATCTTCTTCTCTTAGCCTTTTCAGTGCTACCTTTCATCTCTTTCAGTTTTTCAAATCCCACAGATGTG  
GCACGGAGCAACCCCAAGTCACCACAAAACCTATCGTTAGAGTCTTCTGCCCAACAAACAGAGGACAGTG  
GTACCTGCAAGGTGTGGAGTTACAGTCCGAGACAGTCTAAAGAAAGCACTGATGATGAGAGGTCTAATCCCA  
GAGTGTCTGTCTGTTCACAGAATTCAGGATGGAGAGAAGAAACCAATTGGTTGGGACACTGATATTTCTTGG  
CTTACTGGAGAAGAATTGCAATGTGGAAAGTGTGGAGAAATCTTCCACTTACAACACACAACCTTTGTACGAAAA  
ACGTTTTTTCACCTTAGCATTTTGTGACTTTTTGTGAAAGCTGCTTTTTCCAGGGTTTCCGCTGTCAAACATGT  
GGTTATAAATTTACCAGCGTTGTAGTACAGAAGTTCCACTGATGTGTGTTAATTATGACCAACTTGATTTG  
CTGTTTGTCTCCAAGTTCTTTGAACACCACCAATACCACAGGAAGAGGGCTCTTAGCAGAGACTGCCCTA  
ACATCTGGATCATCCCTTCCGCACCCGCCTCGACTCTATTGGGCCCAATTTCTACCAGTCCGTCTCTCT  
TCAAAATCCATTCCAATTCACAGCCCTTCCGACCAGCAGATGAAGATCATCGAAATCAATTTGGGCAACGA  
GACCGATCCTCATCAGCTCCCAATGTGCATATAAACACAATAGAACCTGTCAATATTGATGACTTGATTAGA  
GACCAAGGATTTTCGTGGTGATGGAGGATCAACCACAGGTTTGTCTGCTACCCCCCTGCCTCATTACCTGGC  
TACTAATAACGTGAAAGCCTTACAGAAATCTCCAGGACCTCAGCGAGAAAGGAAGTCACTTTCATCCTCA  
GAAGACAGGAATCGAATGAAAACACTTGGTAGACGGGACTCGAGTGATGATTGGGAGATTCTCTGATGGGCAG  
ATTACAGTGGGACAAAGAATTGGATCTGGATCATTGGAAACAGTCTACAAGGGAAAGTGGCATGGTGTATGTG  
GCAGTGAATAATGTTGAATGTGACAGCACCTACACCTCAGCAGTTACAAGCCTTCAAAAATGAAGTAGGAGTA  
CTCAGGAAAACACGACATGTGAATATCCTACTCTTCATGGGCTATTCCACAAAGCCACAACCTGGCTATTGTT  
ACCCAGTGGTGTGAGGGCTCCAGCTTGTATCACCATCTCCATATCATTGAGACCAATTTGAGATGATCAAA  
CTTATAGATATTGCACGACAGACTGCACAGGGCATGGATTACTTACACGCCAAGTCAATCATCCACAGAGAC  
CTCAAGAGTAATAATATATTTCTTCATGAAGACCTCACAGTAAAAATAGGTGATTTTGGTCTAGCTACAGTG  
AAATCTCGATGGAGTGGTCCCATCAGTTTGAACAGTTGTCTGGATCCATTTTGTGGATGGCACCAGAAGTC  
ATCAGAATGCAAGATAAAAATCCATACAGCTTTTCAGTCAGATGTATATGCATTTGGAATTGTTCTGTATGAA  
TTGATGACTGGACAGTTACCTTATTCAAACATCAACAACAGGGACCAGATAATTTTTATGGTGGGACGAGGA  
TACCTGTCTCCAGATCTCAGTAAGGTACGGAGTAAGTGTCCAAAAGCCATGAAGAGATTAATGGCAGAGTGC  
CTCAAAAAGAAAAGAGATGAGAGACCACTCTTCCCCAA  
GAGATTTTGCAGCCTTCAAGTAGCCACCATCTGTCAGCATCTGCTCTTATTTCTTAAAGTCTTGTGTTGCTA  
CAATTTGTTAAACATCAAACACAGTTCTGTCTCAATCTTTTTTAAAGATACAAAATTTCCAATGCATA  
AGCTGATGTGGAACAGAAATGGAAATTTCCCATCCAAACAAGAGAGAAAGAATGTTTTAGGAACCAGAATTTCTC  
TGCTGCCAGTGTCTTCAACAAAATACCACGAGCATACAAGTCTGCCAGTCCCAGGAAGAAAGAGGAGA  
GACCCTGAATTTCTGACCTTTTGTAGGTGAGGCATGATGGAAAGAAACTGCTGCTACAGCTTGGGAGATTTGC  
TATGGAAAGTCTGCCAGTCAACTTTGCCCTTCTAACACCAGATCAATTTGTGGCTGATCATCTGATGGGGC  
AGTTTTCAATCACCAGCATCGTTCTCTTCTGTTCTGGAATTTTGTGGAGCTCTTCCCCTAGTGACC  
ACCAGTTAGTTCTGAGGGATGGAACAAAATGCAGCTTGCCTTTCTATGTGGTGCCTGTTCCAGGCCTTGA  
CAGATTTTATCAAAGGAAACTATTTTTATTTAAATGGAGGCTGAGTGGTGAAGTAGATGTGTCTTGGTATGGA  
GGAAAAGGGCATGCTGCATCTTCTTCCGACCTCCGGGTCTCTGGCCTTTTGTTCCTGCTCACTGAGGG  
GTCTGTCTAACCAAGCAGGCTAGATAGTGTGGCACACATTGCCTTCTTTCTCATTGGGTCCAGCAATGAAG  
ATAAGTGTGGGTTTTTTTTTTTTTCTCCACAATGTAGCAAATTTCTCAGGAAATACAGTTTATATCTTCTCT  
CCTATGCTCTTCCAGTCACCAACTACTTATGCGGCTACTTTGTCCAGGGCACAAAATGCCGTGGCAGTATCT  
AACTAAACCCCAAAAACCTGCTTAATAACAGTTTTGAATGTGAGAAATTTAGATAATTTAAATATAAGGTA  
CAGTTTTTAATTTCTGAGTTTCTTCTTTCTATTTTTATTTAAAAGAAAATAATTTTTCAGATTTAATTTGAAT  
TGGAAAAAACAATACTTCCACCAGAATTATATATCTGAAAATTGTATTTTTGTTATATAAACAACCTTTT  
AAGAAAGATCATTATCTTTTTCTCTACCTAAATATGAGGAGTCTTAGCATAATGACAAATATTTATAATTTT  
TCAATTAATGGTACTTGCTGGATCCACACTAACATCTTTGCTAATAATCTCATTGTTTCTTCCAACCTGATTC  
CTAACACTATATCCCACATCTTCTTTCTAGTCTTTTATCTAGAATATGCAACCTAAAATAAAAATGGTGGCG  
TCTCCATTCAATCTCCTTCTTCTTTTTTCCCAAGCCTGGTCTTCAAAGGTTGGGCAATTTGGCAGCTGAA  
TTCCCAGACAGAGAATAGAGCAATTTTAGGGATATTAGGACTGAGGGAGGGTGTGGGAAAGCTGTCTCAGT  
TGTTTTTATAGAAAGAACTGGCATTCAATTAAGAACCTAAATCTTATCTTTGCACAAATGAAAATATAACCT  
AGTTATAGCTTCTTTGGCCTTTATTAAGGGTAATATCAATCACAGTCATAGCAAAGAAAGCGGATGTATT  
AATGGCAAATTAATGAAAACCTCCCTTATCAGGAATCTAGACTCAGAATTTAGGAACACAAATCAAATCAG  
ACCAACCAAGCTATAGCCAAGGACTTGAAGAAATTAACAAGACCAGAATAAATCAAGGAATTAGAAATTT  
GTTATTTAAAATTTTCAGATTGTAACCTCAGGCCCTGCTGTCTATATTGCAGCCACTAAAAGCTCACTACCA  
TTAGATTTTTGCTAACATACATGTATTGAGAAGAAAGCCTATTGAAATTTTCATTGTCTTGTAAAAGTTGT

CCTAGTAAAATGGAAAAGATCCTTAAGTTATTAATCAGTTTGAAAAGCAAATTTGTTTTTAAGTTTTACATC  
AGC **AGGGCAGTGTCTTACAAAA**TTCCAGAAATTGCAAAGGTGGAAATAATTCACGCTGATTTGAAGAACATCT  
TCTGTGCAATAATACTGCCTCTCTTGAAAAGCATTGGCTGTTTTTTCTTTTTAAATATATCTCTAGATGCTT  
TTAAATGT **GGCTGTGTTCCCTTTACCA**AGATTGGCTTCAAGTTTCCGCAGGTAGAGAGACCTGGGCTTGAAC  
AAGAGGATGTGTTTCATGTCCTGCTGAGGAGGTAGAACATGTGCAGCCTGGGTCCGGGACTGCCTCCGTGGG  
GCAGGGGCAGGGGCGGTACCATTAGGGAGGAAGCTTAGCATTTCAGTTTCTTAAACAATATTCAGGGTGATA  
CACTTTTTCTTCCCTTGCAATTTAGAAATAGGCTGGTATCTCATTGAACGGGGGAGCAGACTTGATCTCAAA  
TGAAGCTGTGCCCAGGAGCCAGGCTTAGCATATTGAGATTTTTATAGATAACCTTAAAAATAAAATATTTAA  
ACCTCTTTTTCTTCTTTTTCTATGAAATAGGTTTTTTCTCTAGTTTACAAATGACATGAAAATAGGTTTT  
ATTTGTGTTTTATCTGCTTTATTTTTTGATGCTTAGACAACAGTTAGACTTACTGAGCTCTAAAAAACGA  
GGAAGAAGTCTTATTTGTGAAAAGCACTTTATGAGTAATTGTATAGAC **AGTATGTGGCTGCGTCACTGATC**  
ATCTTGTAAGGGTGTAAACAGTCTTGTCTGTAAAGTGGCTGCAGTGCCTTCTGTAGTGTGTTTTATTTTTGGT  
AGGGAGAGGTGAAGCCTTCTGAAAAATTTGAGAGCAACTACAGAGGATTGTTTGTAACTGTGTAGTATTCCT  
GATGGACTTTTTCTCATCGTTAGAGTCAAGGACCTAGACTTTTGCCACTGAAATAATATTGACCAAAAAATA  
GTTTATAAAAGGATTTGTGAATAGAAAATTCAGTGTGATCATTGTTGTTAATGTGCACCTTAAAGAAGA  
TTCTGTCTAGCTGTCAAATCTGGTTCGCAATATCTCACCCCTGATTGTATTTGAGATCTAGTAGGGCATA  
CTGGGGCATTTTAGAAGATAAAATCCCATACAAATGATATATGCTATATTTATGTTGGTGTGGAGAAGAAA  
GAGCAGTATATAAAGAAATAATTCAGACTGCAGCACTGTCAACCTGAAACTTTGTAAATATTT**TCCTAGCTT**  
**CTGGTTTTGGTGC**CGGTGACAGCACTTTTCATCACAGGATGTTACCTTGTATTACCAGGCGGAGTGCAGCTGC  
**TGCACATCTCTCAGATC**TCACCTGTCCCACCTGTACATCCACCCGACGCTTGCAAACTCATCTCT  
AGCTTTTAGTTTCGAAACCACATTTGCAGGTTTCAGGTGACCTCTACAAAAAACTACCTCTTCAGAATGAGGTAA  
TGAATAGTTATTTATTTTAAAAATATGAAAAGTCAGGAGCTCTAGAACATGACGATGATTTAAGATTTTAACT  
TTTTTGTGTACTTGTATTTGAGCACTCTCATTGTTGCTTAAAGGGCATTATACATTTAAGCAGTAATACTGT  
AAAAAATGTGTTGCTCGGAATATCTGAATGTTGTTGAAAGTGGTGCCAGAACCGGTTTAGGGGTACGTTTC  
AGAATCTTAACCTTGAGTCAATTGCATGAAATTAATAGCTGTGGTATCACTTCACTAACAGTGTGTAATT  
TTAATTTTCAGTAGGCTTGGCATGACAGTACATCCTCATAATGAGTTTGTGTCAGCTTTGTCCATGCACAG  
GCATTCATAGAAAGACCACCCAGCTAAGAGGGTAGAATGATTACTTTTTGCAAGATTCTCTTTCTTTGTCC  
AAGTTGGCATTGTTAGTGTAGGAATACCAGCACCTTGAGACGAGCAGATTCCAACCATTAGGCTATAAACA  
CCATAGCCAGAGATGGAAGGTTTACTGTGAGTATGAACAGCAAATAGCTTACAGGTTCATGAGTTGAAATGGT  
GTAGGTGAGGCTCTAGAAAAATACCTTGACAATTTGCCAAATGATCTTACTGTGCCTTCATGATGCAATAAA  
AAAGCTAACATTTTAGCAGAAATCAGTGATTTGTGAAGAGAGCAGCCACTCTGGTTTAACTCAGCTGTGTTA  
ATAATTTTAGAGTGCATTTAGACTGCATAGGTAATGCCTAAAGAGTTTATAGCCAAAAATCACATTTAA  
CAATGAGAAATCACACAGGTAAATTTTCAGTGAACAAAATATTTTTTTTAAAGCACATAATCCCTAGTATAG  
TCAGATATAATTTACATAGAGCAACTAGGTTGCAAAATATAGTTTCACTGACATTTCTAGAGAACTTTTTT  
TACTCCCATAGGCTCTTCAAAGCATGGAACTTTTATACAACAGAAATGTTGACAGAAATGCTGTAGTTTAG  
GGTTGAAGTACTGT **ATGATGGGCAGCAATCATGTATT**AACTTAGAAGGGGAAATTTGAAATATAGGACCGAAT  
TTGGTTTTATCAGTTTCCAGAGTACTGCTGCCAACCTAGACACTGATTTTTTCAGAGTTTGAATGTAAATTT  
CTTCCCGGGA **CTTGATTGCACATGAAGCTGGACTGCGTTA**GTCTCCTGTCCCAAAGCGCTGTGGGGCCAG  
GGTGGAGGTCTCAAGGC **ATCCTTTATGACCTGGCCAT**TGGATGTAAAAGAAAACATATTCATGCTGTGGTT  
CTTGTATCTTGTTCATTCTCACCATTGAAAGAGAAAGTCCATGTATTGTCTCCAGCACATCCTTGAATG  
TTATACTGGGATGGAATTAATGATGCCATCGGTAGTTGAGCCCCAGAAGAGGGTAGTAGCATCTCTGCCTCA  
GGTGTATGATTTGTAGCTTGGCCAGAGGAGAGCGGAGTACCAGTATATCTGTGGTCCATGTTGCTAGCTCTG  
GTAAAATTAATAACTGGTAAGATGTTTGTTTTTATTAGTACACTAGACAGTAAGCTCTGTTTTGTGTTTT  
CAAATAACCTATTTTCACTTTTGTTTGGGCAAAGACATTTAAATTTGAAATTTCAATTTCTAATTTTTGTAAAT  
GTGGAAGGGTAATTAACAGTTCCTATCAGTATTTTTAAATGTGAAAAGGACAGAAAACCACTCTCAAAA  
TCTTAAATTAAGGTAACAGTGTCTTAAAAAAA **AAAAATGCATGGGGCAATTAG**TCGGCAACTCAATGAGTGA  
CTAAAGTACTTTTTTAAATACATCCACAACCTCAACTGTTAAGTTTTTAAATTAATTAATAATCAGCTTTATTA  
AATGTTGACATTTATTTAGCTATTTTGAATAATTATAGTACTTGACGAGTGTGTATGAGGACACAGCCAAT  
GTAAGCCAGTGTATCCATTTTTTATAGAGGTGCATTTTTTTTTTAAAGAATTCTGTAGATAGAAGTGTCTGAAA  
ACAATAAATATGTTTATTCATGGTAGTATCAAAAAATGTTTGTACAAACCATCTGCTTCTCCCGGCCAGC  
CGAGTTCACTTCCAGCACCG **TGACCGCTGGTTCTCATGTA**CAGCACATATGCGGGAGAGTTGGCAGAAAAT  
TTGTGAAGAGATGCCGCAAAGGAAGGTCTGTTGACGGGTGGGATTGGGGTTTTGATGAAGTTGCTTAGTC  
CTGGTTTTGTTTTGAAAATTAATGCGTTGCATTTTTGTGTTAAGTTTTTGAACCCACGTGTGTTTTGGTGG  
GTATGAGTTGGAAGTCACTGCAAACCTAGCATAAACAACAAGCTCACAGAGTAGGCACAGATGTAGAGAACA  
GAGACCAAAATGGGGTGAGGTGGCAGTAAATCTAGGATAGGGAAAAATTAATGTGAGGGTGGGAAATAAAT  
GTAATTACCTGAAATCAAATGTAAGAGTGAATAAGTATGCTTTTTTATTCTAAGCTGTGAACGGTTTTTTTT  
AGAATCATTCTTCTAATACATTTGTGTATGTTCCATAGCTGATTTAAACCAGCTATATCAACATATAATG  
CCTTTTTATTATGTTAATGACCAACGTAAGTGGCTAGCCTTTATGTCTTATTTATCTTCATGTTATGTTAG

TTTACATACAGGGGTGTATGTCTCTGTGCTGTCCCCTTCTCCTGCCTTCATTTTAAAATGCATCCATGGGTC  
CTCCGTGTTTCCTTTGGCCATGCCACATATATAGACTCAGTTTGGCCTTCATGATATCGCCTGATTTTTGAG  
GACTGTATCACAGTGATATGTATTTGTGGTAATCTCATTTGTTGGTTGTACATCTGATCCTTTCCTCAACAT  
GGCAATTGCTGCCTTTCCTAAGATAGGATCATACAACATGATCAGGGGATTGAATTTGATCATTTCATCAACAT  
GTGTCTCTGAATTTTATTTCAGTAGTTGTCATTGCTCTTTGGTTTAGACCAAGAAAAAGGAAATCCCCCTTT  
TCATGTATTCCCTTGGTTTGAGGACATGACTCCTGTAAGGGAGAGGAAAGGGAGATGCTTCCTGTTTGAAGT  
CAGTGAATTCACGGTTCCTGTTTCACCACTCCAAACCTTATGGCGACTCACACACACATTTCCTCTTTTCTGT  
TACTGCCAAAGGTTTCGGGTTTAGTACACTTCAGTTCCTCAAGCATTGAAAAGGTTCTCGTGGAGTCTGGG  
GCGTGCCAGTGAAAAGATGGGGACTTTTTAATTGTCCACAGACCTCTCTATACCTGCTTTGCAAAAATTAC  
AATGGAGTAACTATTTTTAAAGCTTATTTTTCAATTCATAAAAAAGACATTTATTTTCAGTCAAATGGATGA  
TGTCTCCCTCTTTTCCCCTATTCTCAATGTTTGCTTGAATCTTTTATTATTTTTTTAATTCTCCCCCATA  
CCACTTCCTGATACTTTGGTTCTCTTTCCTGCTCAGGTCCCTTCATTTGTACTTTGGAGTTTTTCTCATGTA  
AATTTGTATAACAGAAAATATTGTTTCAGTTTGGATAGAAAGCATGGAGAATAAAAAAAGATAGCTGAAATTC  
AGATTGAAGAAATTTATTTCTGTGTAAAGTTATTTAAAAACTGTATTATATAAAAGGCCAAAAAAGTTCTAT  
GTACTTGATGTGAATATGCGAATACTGCTATAATAAAGATTGACTGCATGGAGAA

**START codon**

Exon 17

Exon 19

**STOP codon**

si-totBRAF

si-flBRAF

si-BRAF-E19-1/2/3

primers totBRAF qRT-PCR F/R: 153bp

primers BRAF-X2 qRT-PCR F/R: 105bp

primers BRAF-E19-1/2/3/4 qRT-PCR, 4 F/R pairs: 74, 100, 99, 101bp

primers flBRAF qRT-PCR F/R: 115bp

primers BRAF-E7, E8, E9-10

used with BRAF-E19-1 qRT-PCR R:

1452, 1351, 1202bp

primers BRAF-E19-1/2/3/4: 4 F/R pairs, 623, 565, 609, 595bp

BRAF-E19-1 F coincides with BRAF-E19-1 qRT-PCR F
